# Supplementary material for: Crystal structures of ternary complexes of archaeal B-family DNA polymerases
Source: PubMed Central journal article supplement (PMC5718519; doi:10.1371/journal.pone.0188005), 2017-12-06
Supplement: pone.0188005.s004.pdf [file pone.0188005.s004.pdf]

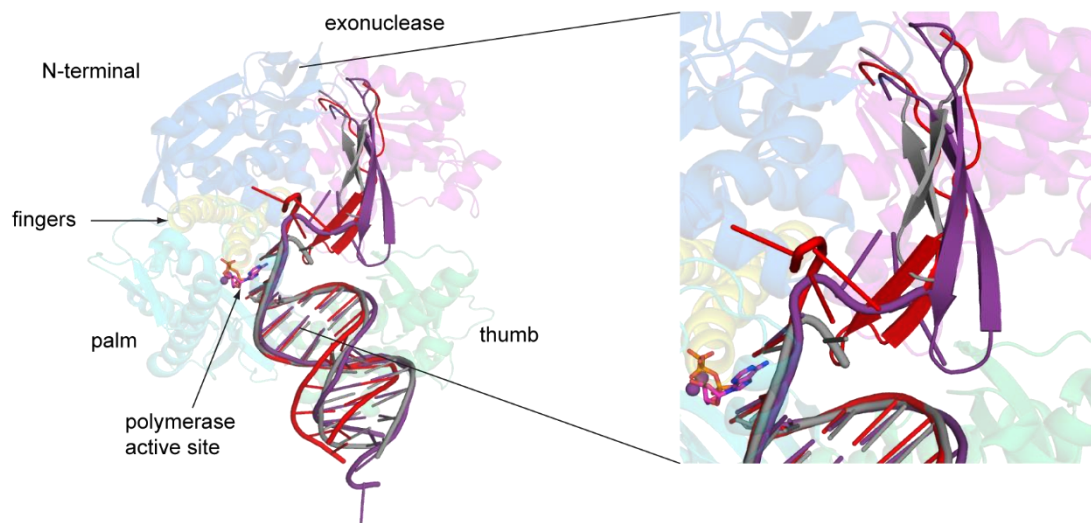

**S3 Fig. Position of the  $\beta$ -hairpin in DNA pols KOD, RB69 and  $\delta$ .** After superimposition of the polymerases, the  $\beta$ -hairpins of DNA pols KOD, RB69 and  $\delta$  are shown in grey, purple and red, respectively. The DNA is shown in grey, purple and red, respectively. For orientation, the domains of DNA pol KOD are shown color-coded in transparent.
